# Supplementary material
Source: publisher site journal article supplement (https://www.dovepress.com/article/389155)
Supplement: Supplementary file 1 [file get_supplementary_file.php]

Supplementary Figure


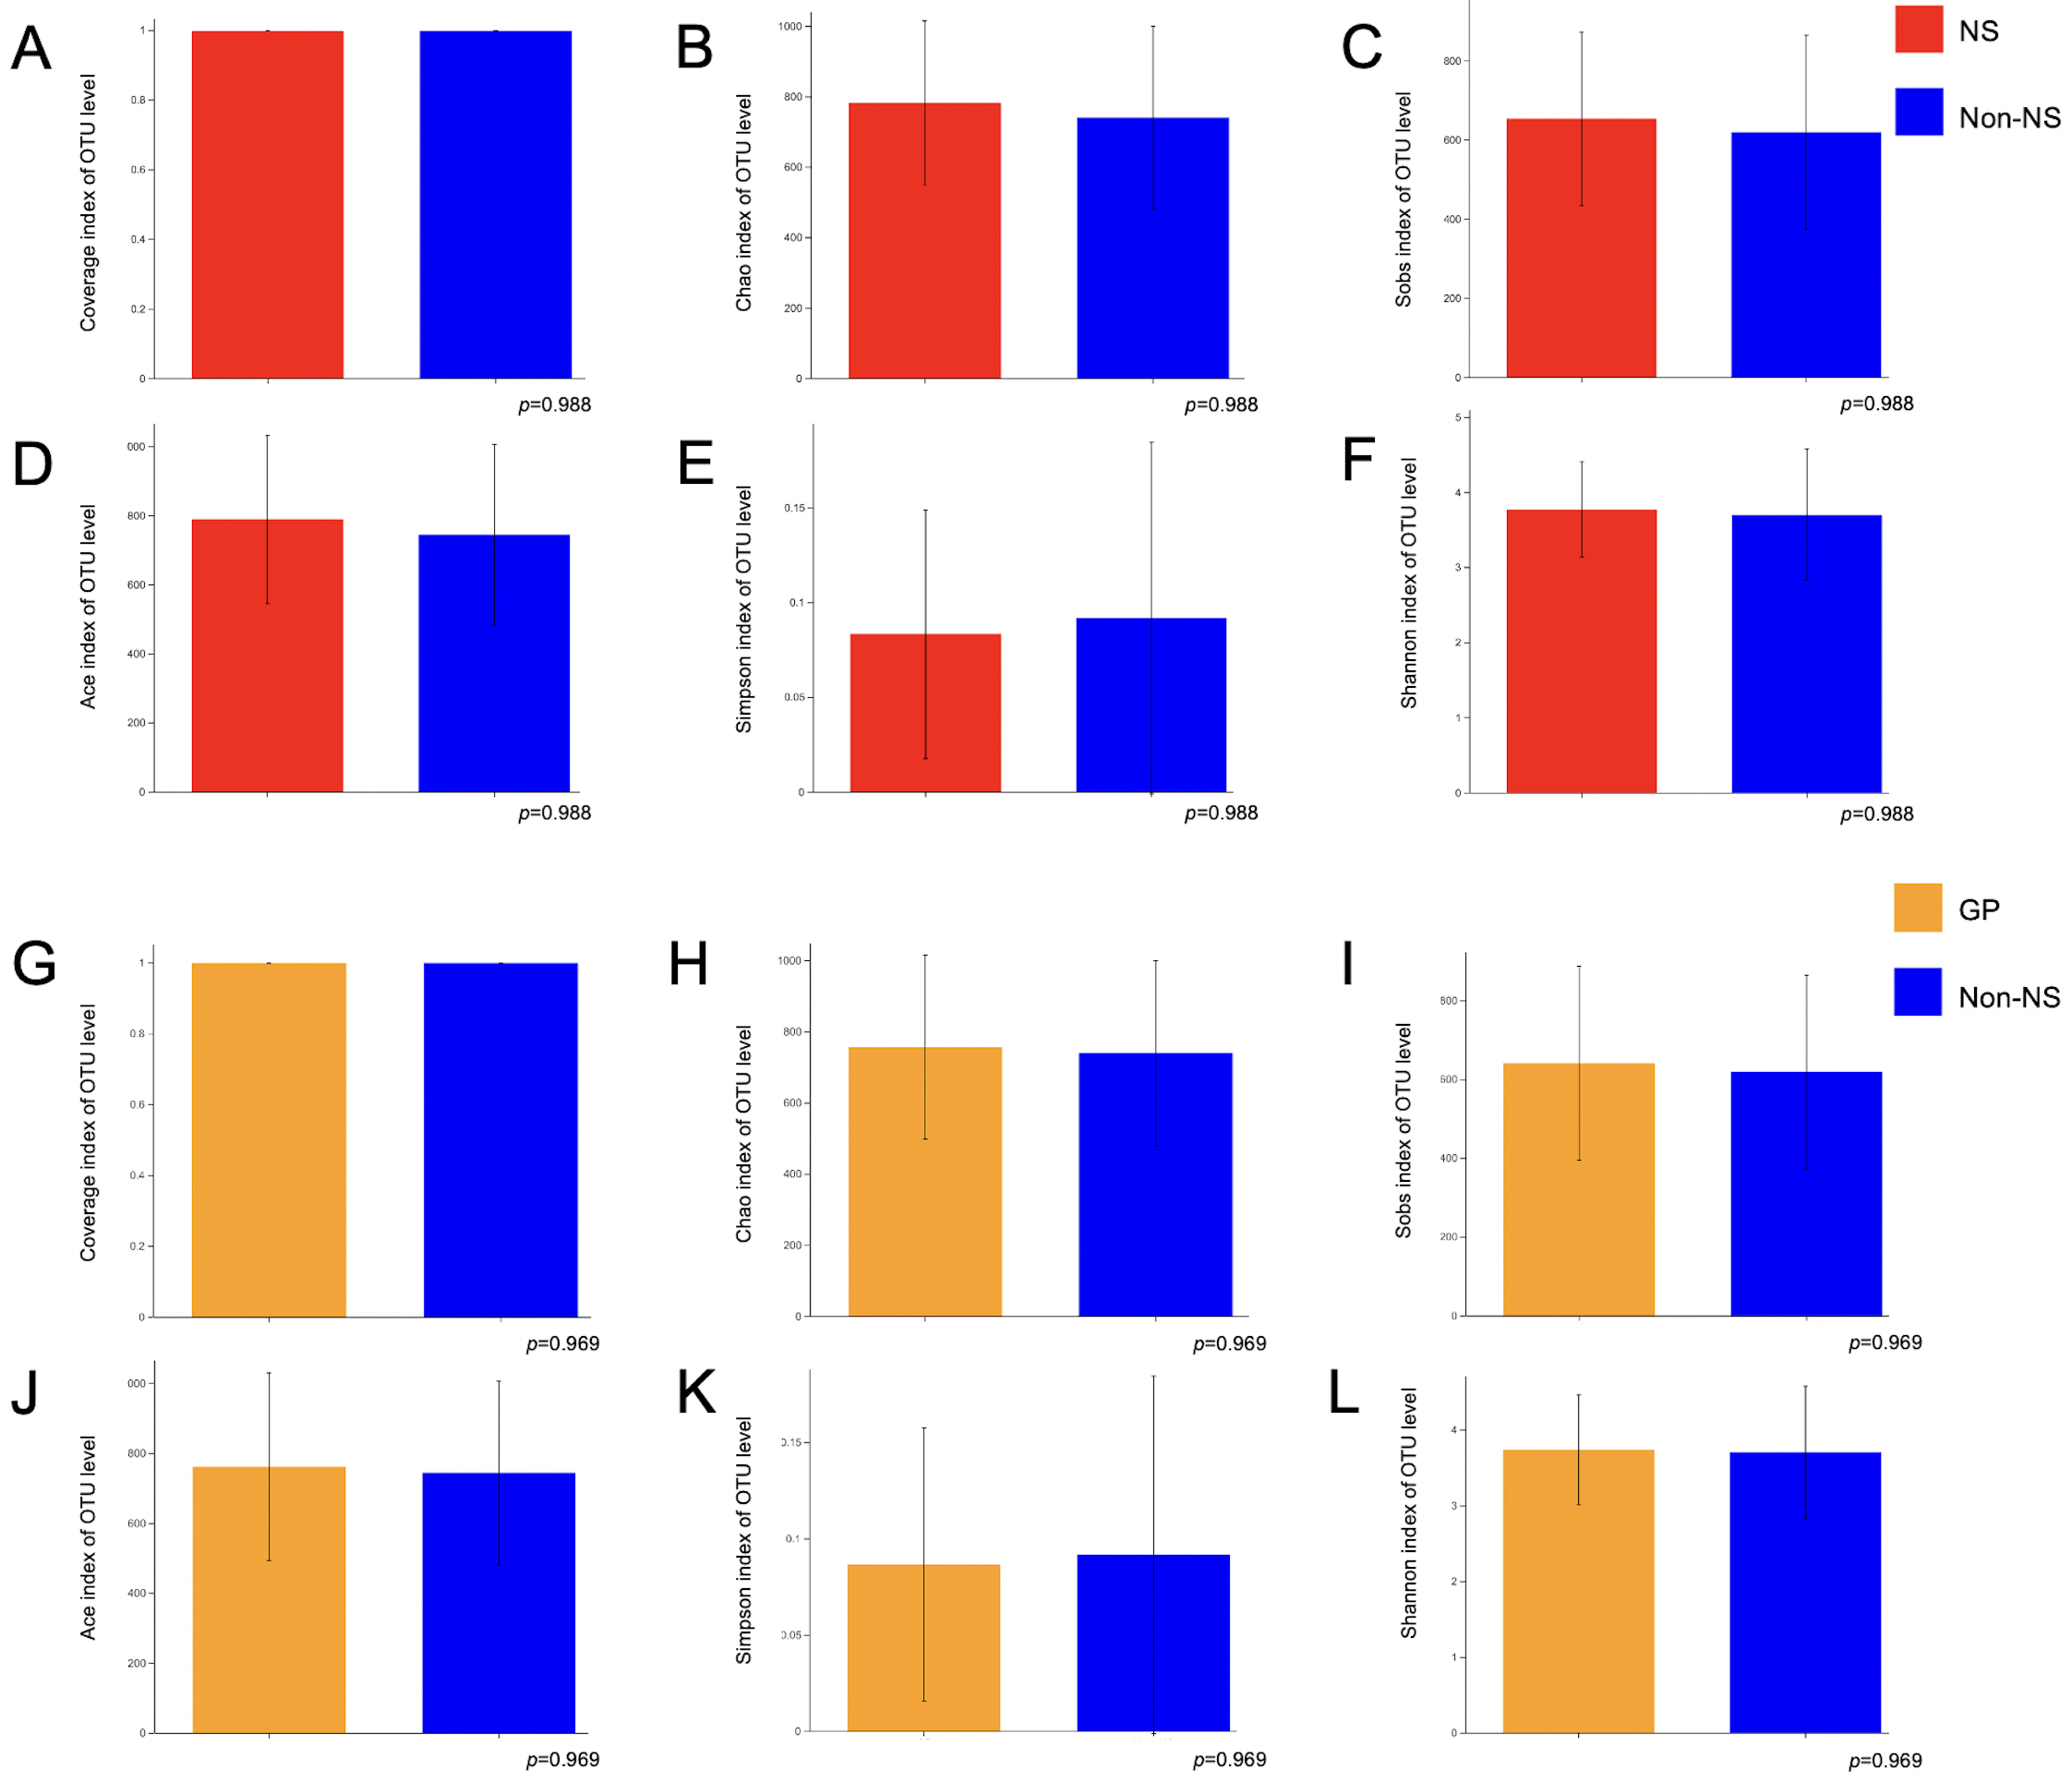


**Supplementary Figure 1.** Alpha diversity analysis. (A) Coverage index, (B) Chao index, (C) Sobs index, (D) Ace index, (D) Simpson index and (E) Shannon index for NS group and non-NS group. (G) Coverage index, (H) Chao index, (I) Sobs index, (J) Ace index, (K) Simpson index and (L) Shannon index for GP group and non-NS group.


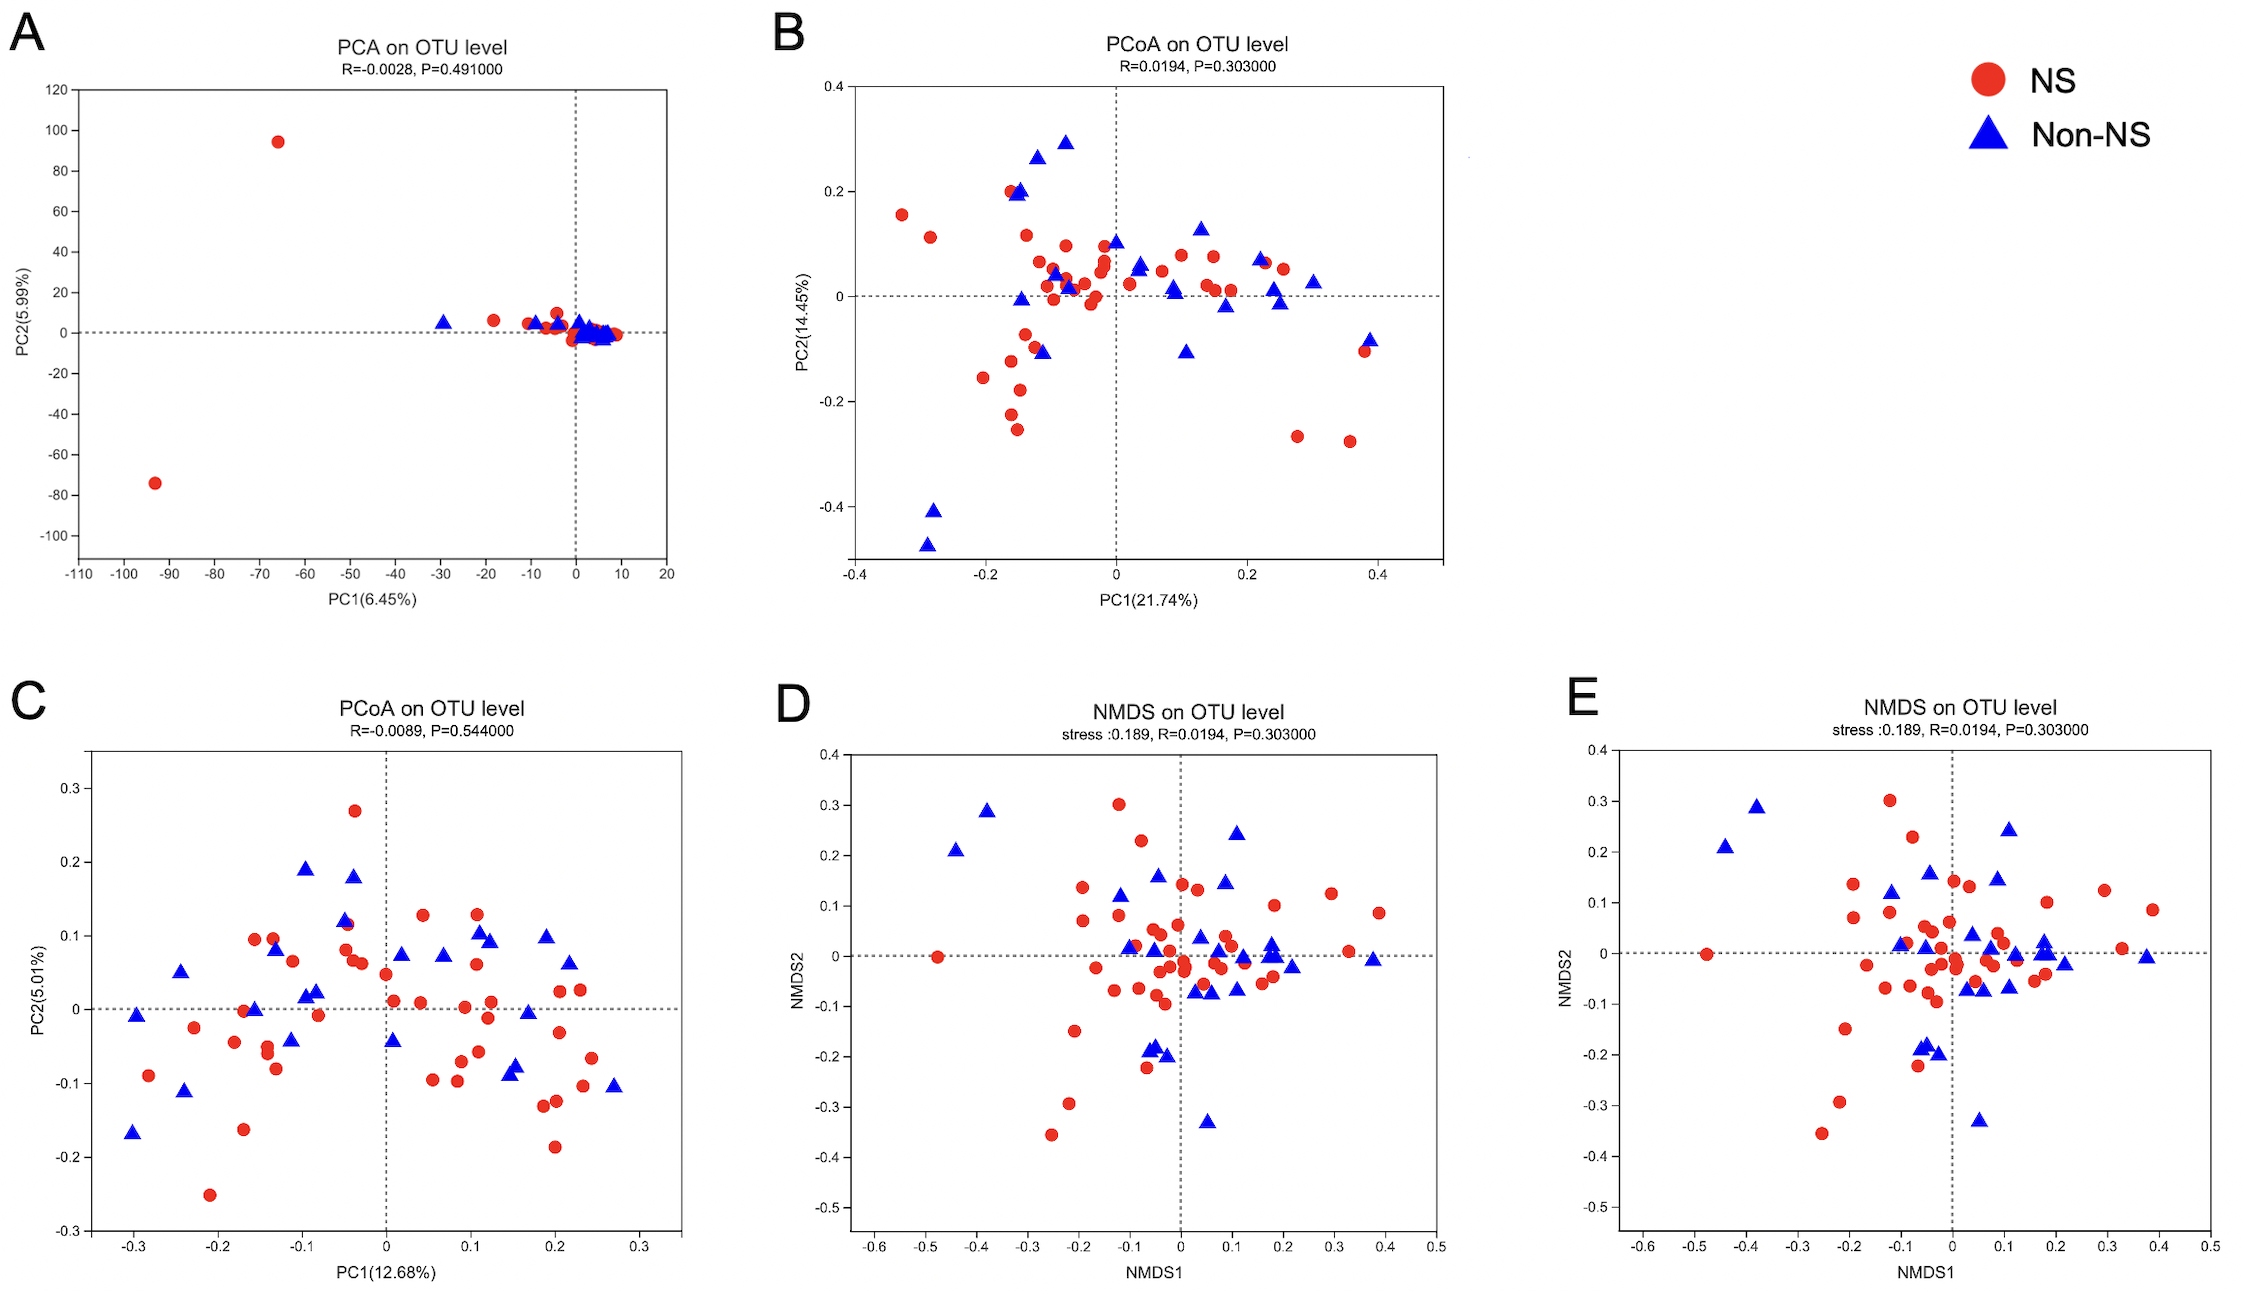


**Supplementary Figure 2*.*** Beta diversity analysis for NS and non-NS group. (A) PCA, (B) PCoA weighted unifrac, (C) PCoA unweighted unifrac, (D) NMDS weighted unifrac and (E) NMDS unweighted unifrac analyses of samples from NS and non-NS group.


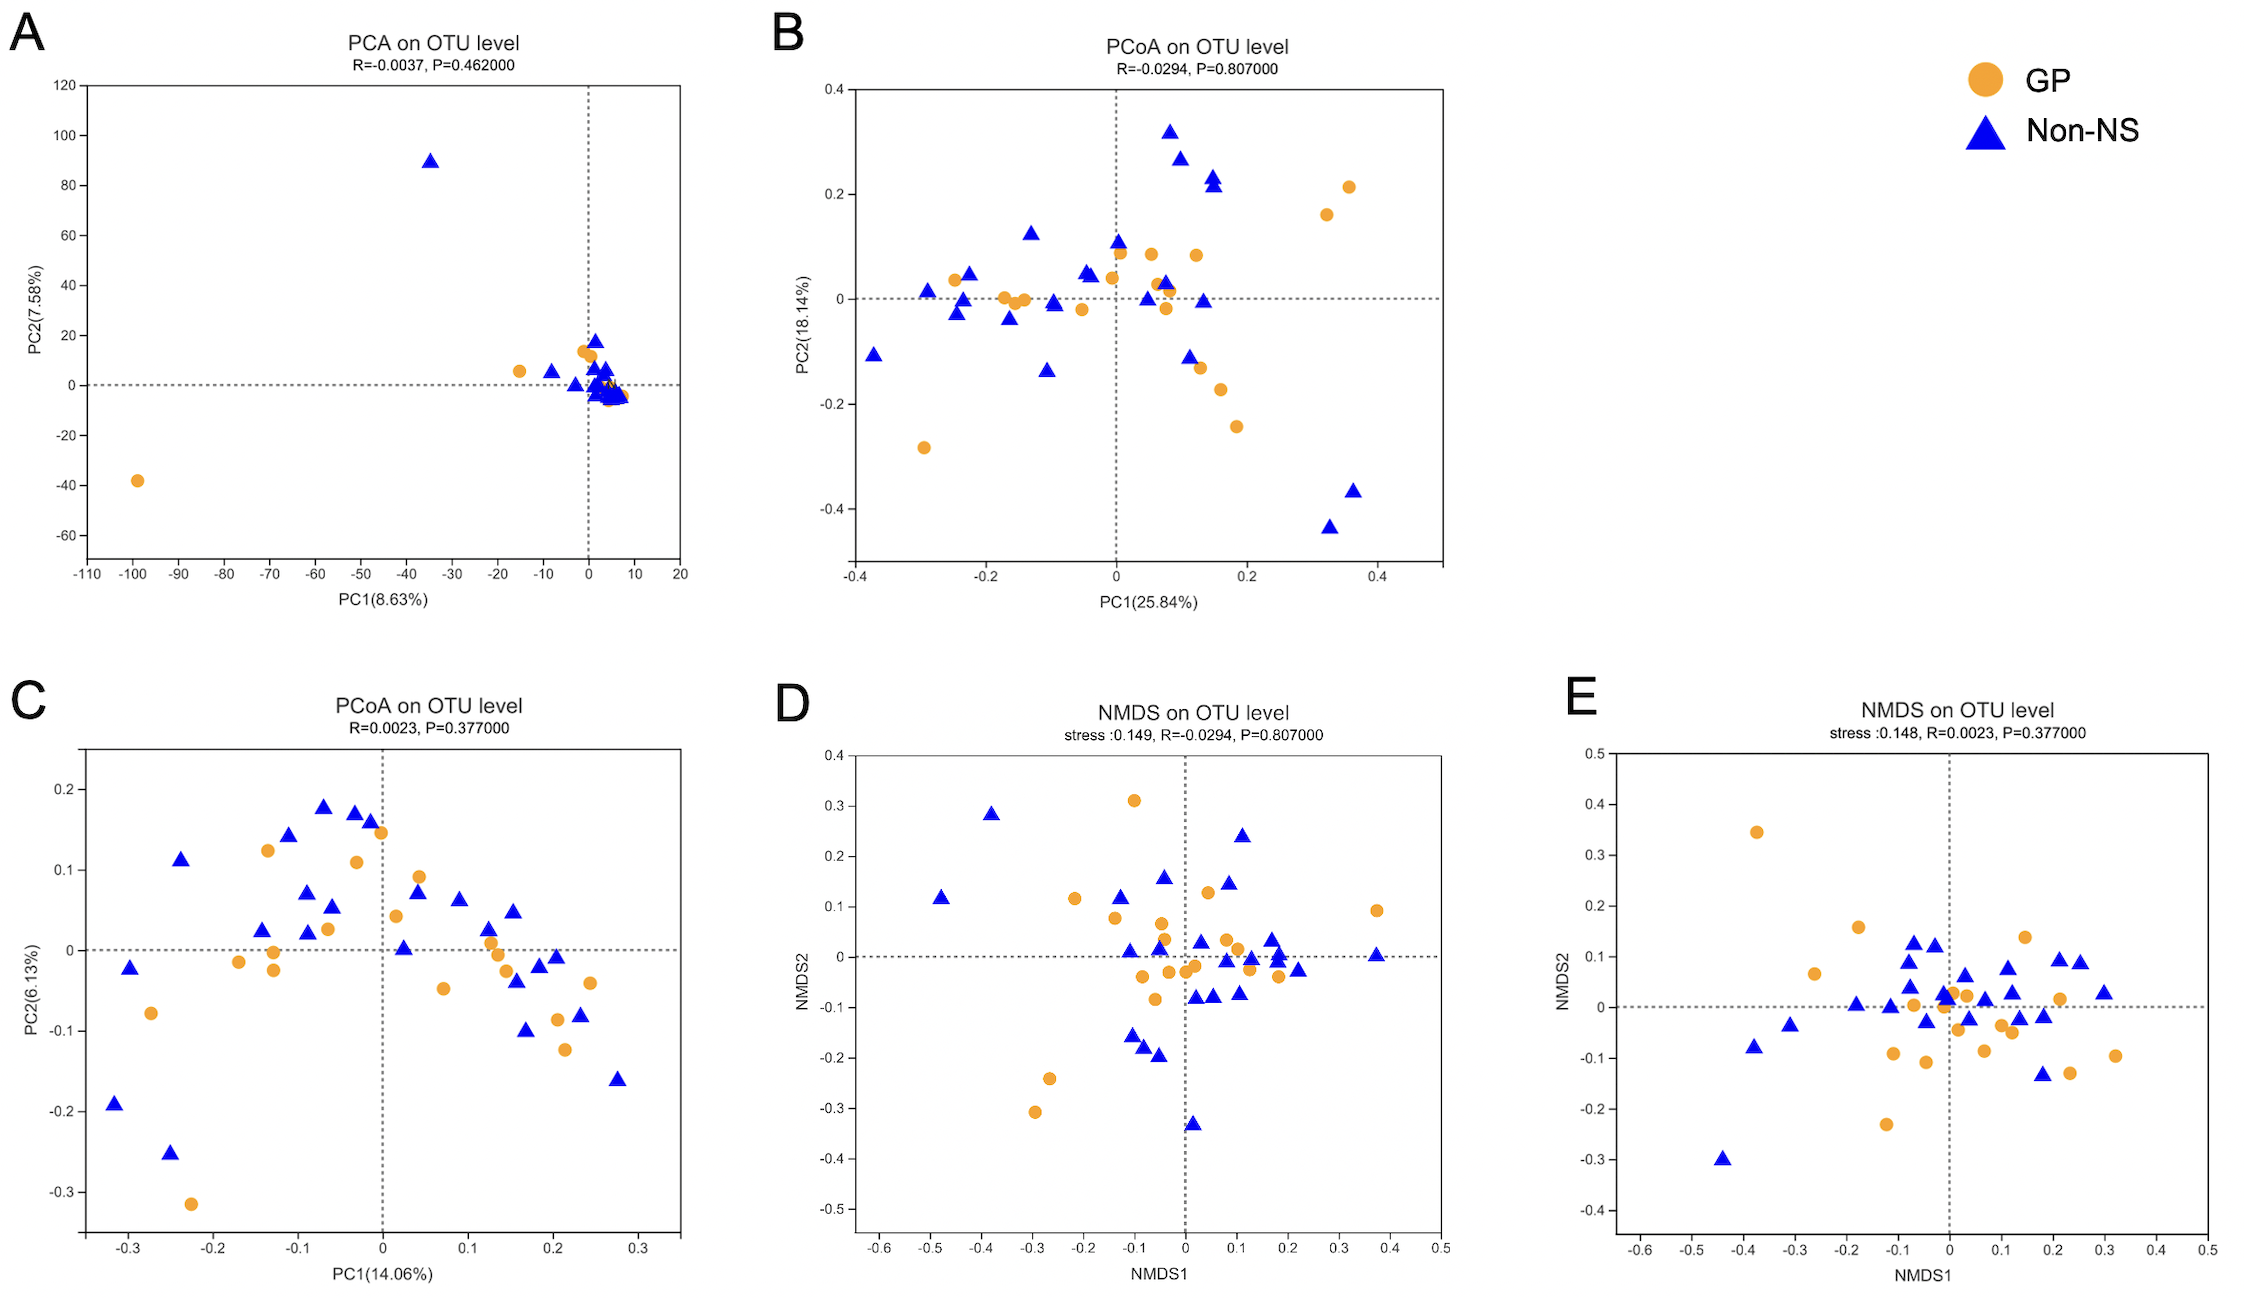


**Supplementary Figure 3.** Beta diversity analysis for GP and non-NS group. (A) PCA, (B) PCoA weighted unifrac, (C) PCoA unweighted unifrac, (D) NMDS weighted unifrac and (E) NMDS unweighted unifrac analyses of samples from GP and non-NS group.


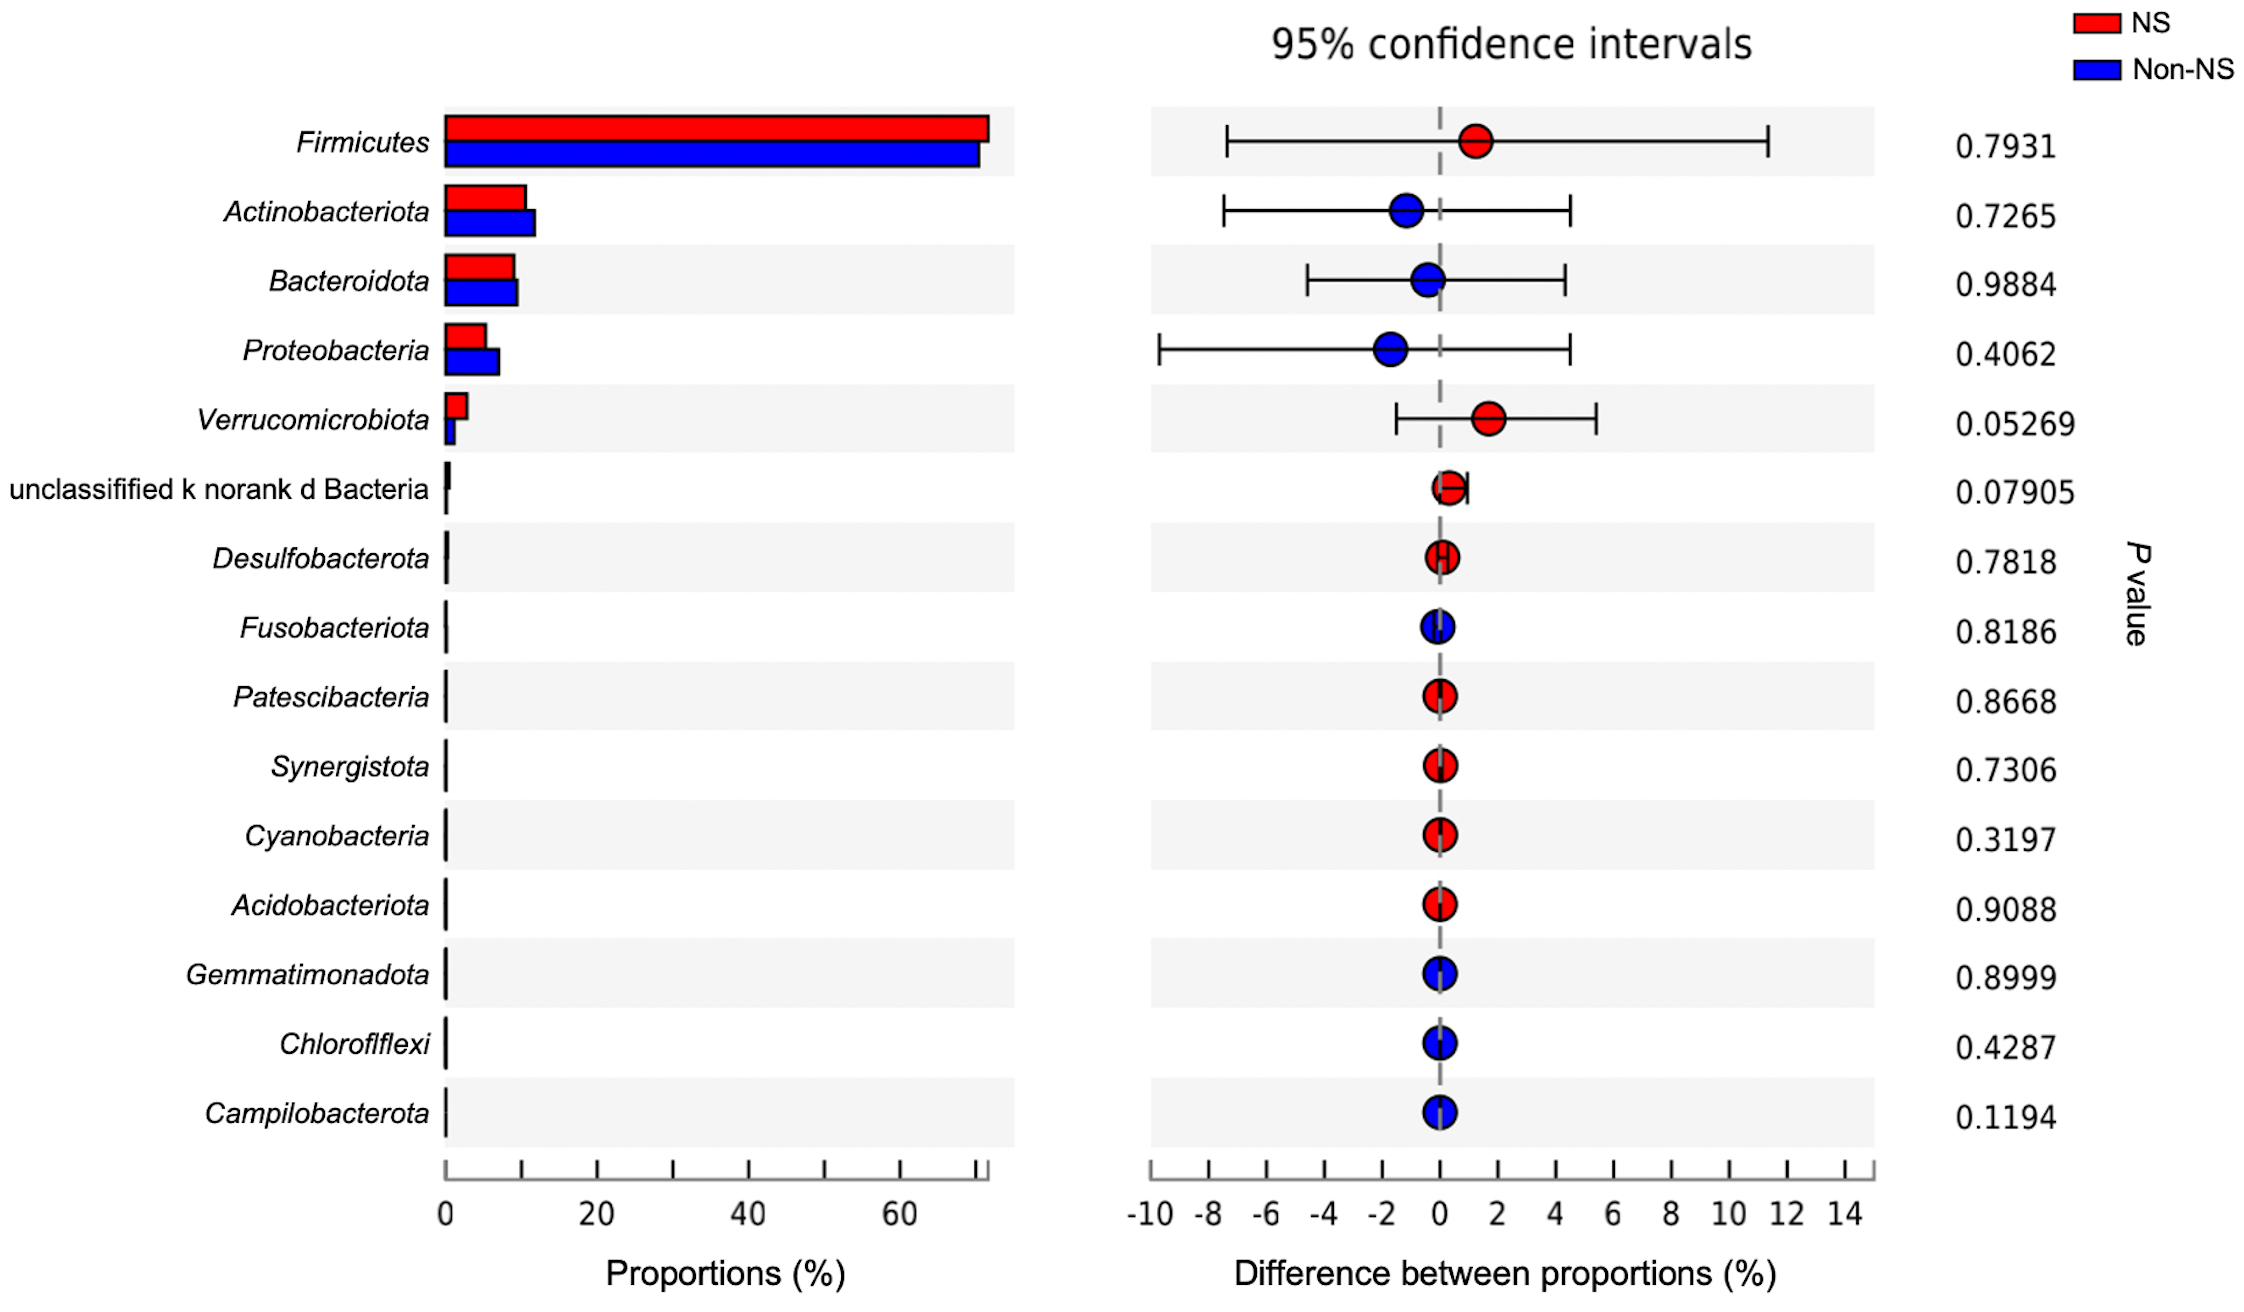


**Supplementary Figure 4.** Wilcoxon rank-sum test bar plot of NS group and non-NS group at the phylum level.
